# Supplementary material
Source: PubMed Central journal article supplement (PMC5704653)
Supplement: atv-37-2322-s001.pdf [file atv-37-2322-s001.pdf]

Graphical Abstract

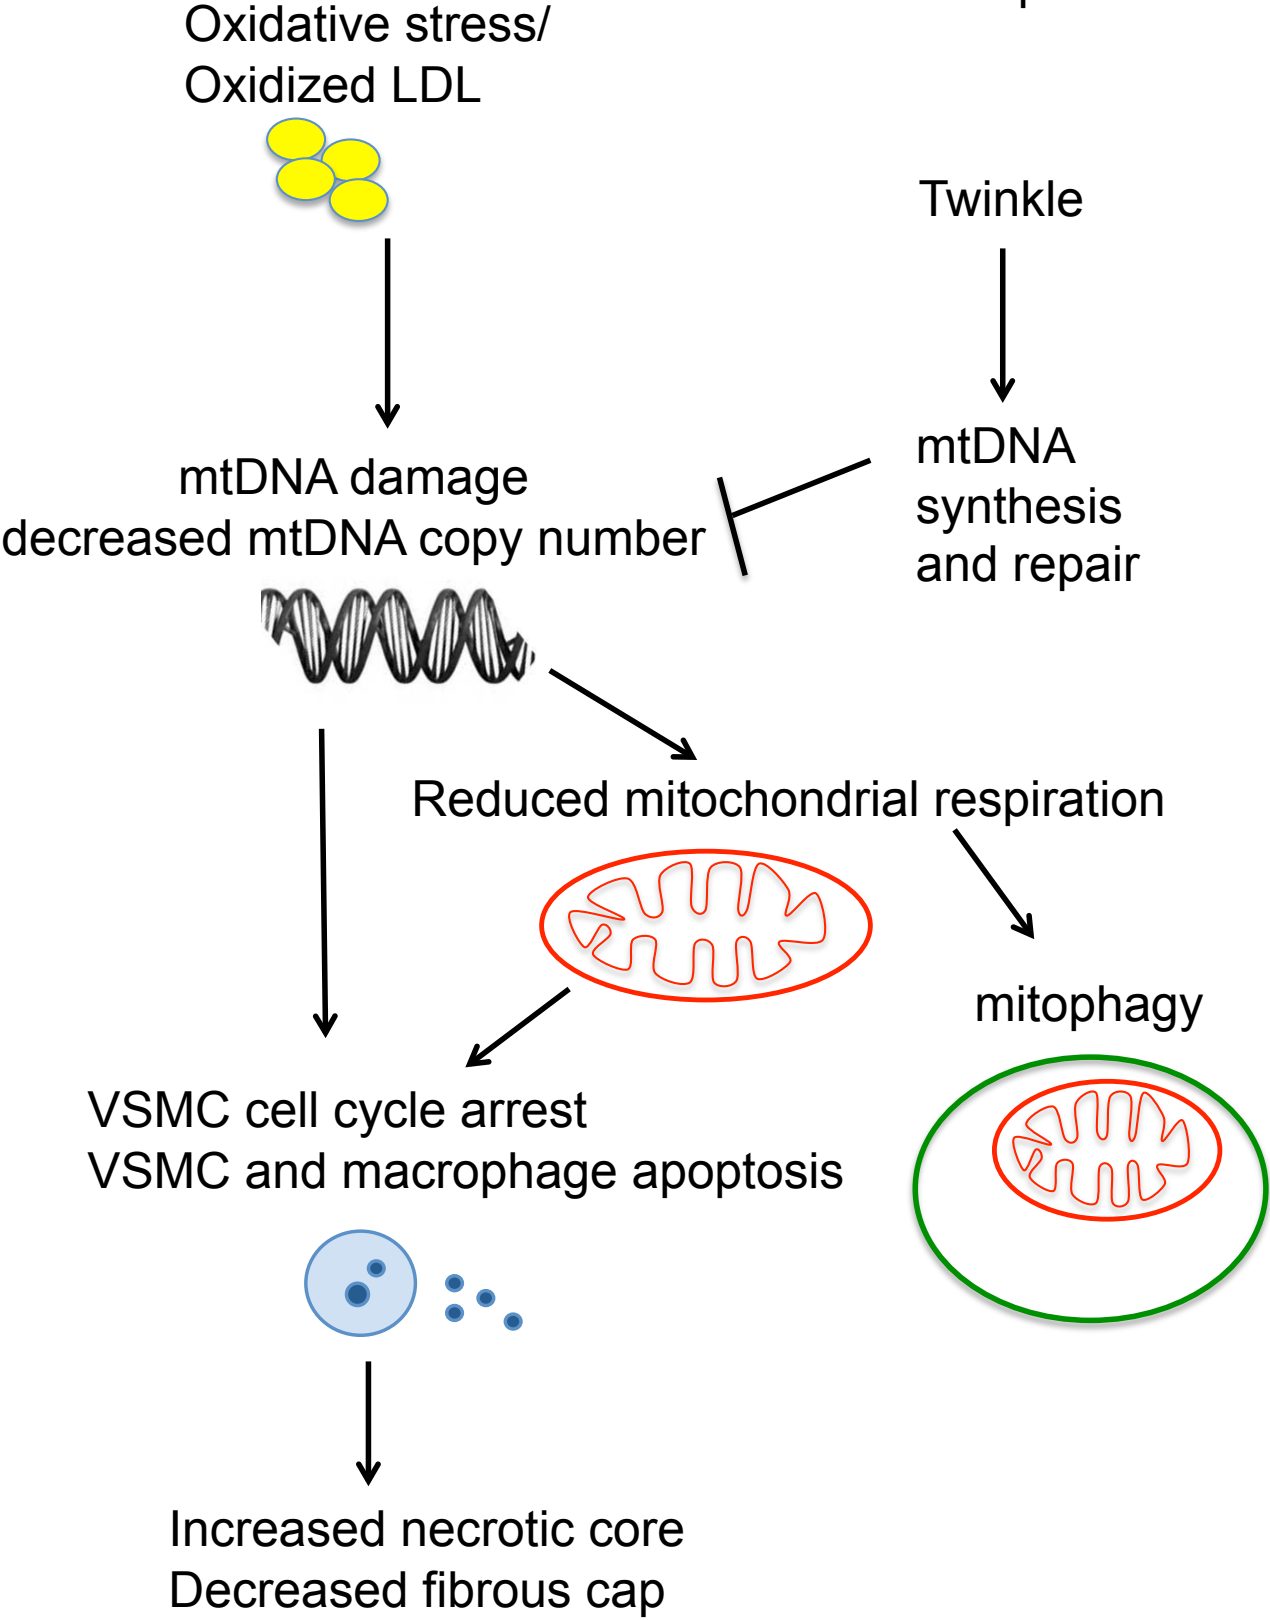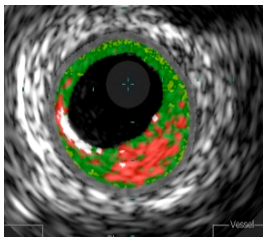

Model of mtDNA damage and dysfunction in atherosclerosis
