# Supplementary material
Source: PubMed Central journal article supplement (PMC5704653)
Supplement: atv-37-2322-s002.pdf [file atv-37-2322-s002.pdf]

## Supplemental Figures

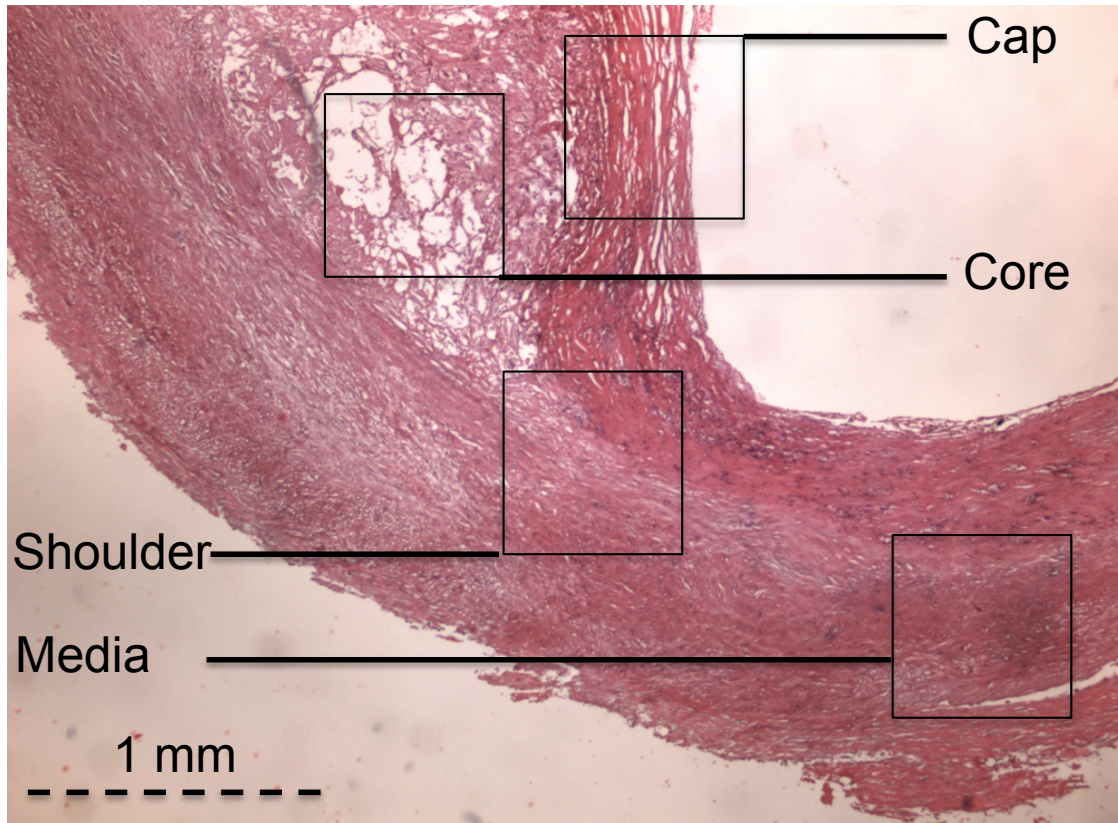

**Supplemental Figure I. Illustration of sample areas for Seahorse experiments of carotid endarterectomies.**

Hematoxylin and eosin stain of human carotid endarterectomy sample. Top right: lumen. Sample areas used for Seahorse experiments and scale bar are depicted for illustration.

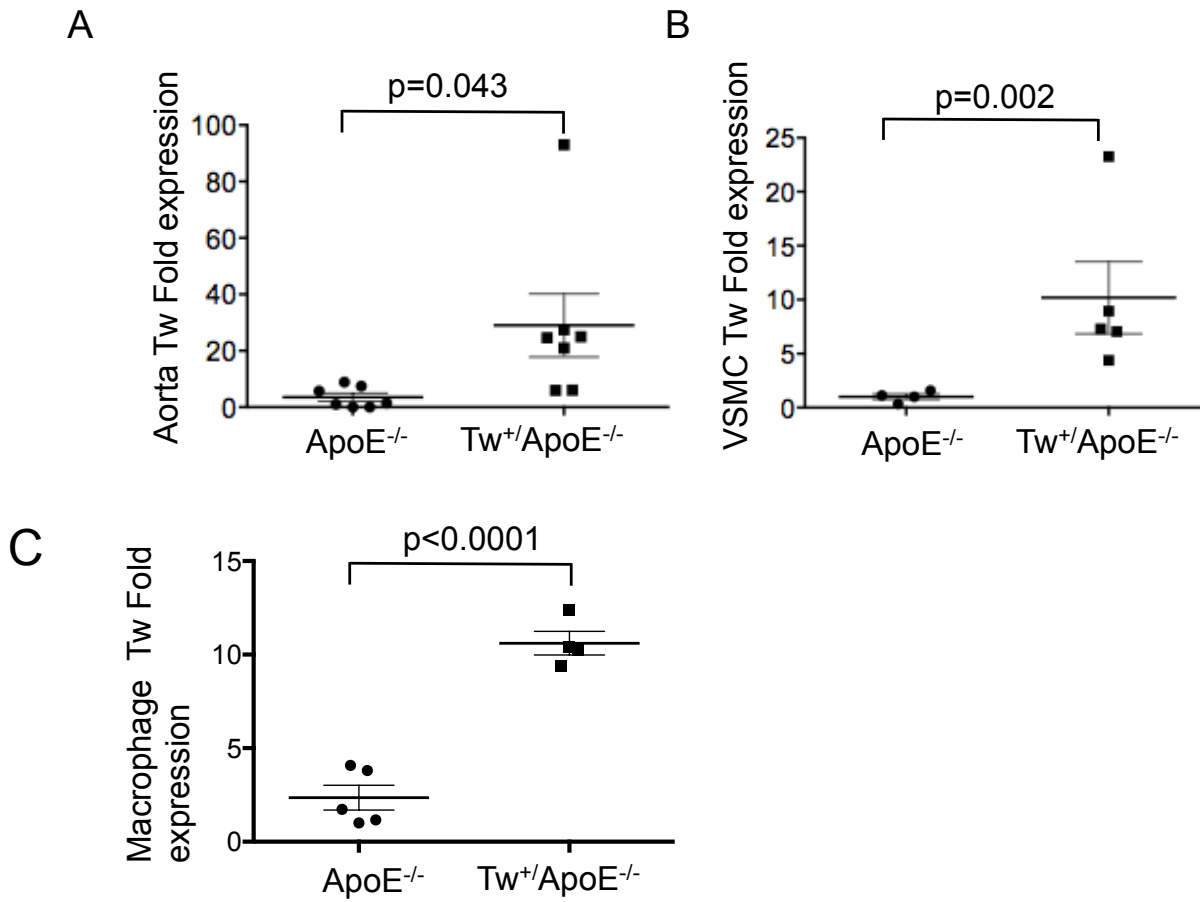

**Supplemental Figure II. Twinkle mice show increased levels of twinkle expression in aortas, VSMCs and macrophages**  
 qPCR for fold expression of Twinkle mRNA in **(A)** aortas after 14 weeks HFD, **(B)** cultured VSMCs or **(C)** cultured bone marrow-derived macrophages from Control ApoE<sup>-/-</sup> mice or Tw<sup>+/</sup>ApoE<sup>-/-</sup> mice. Data are expressed as fold expression in Tw<sup>+/</sup>ApoE<sup>-/-</sup> vs. ApoE<sup>-/-</sup> mice. n=5-7.

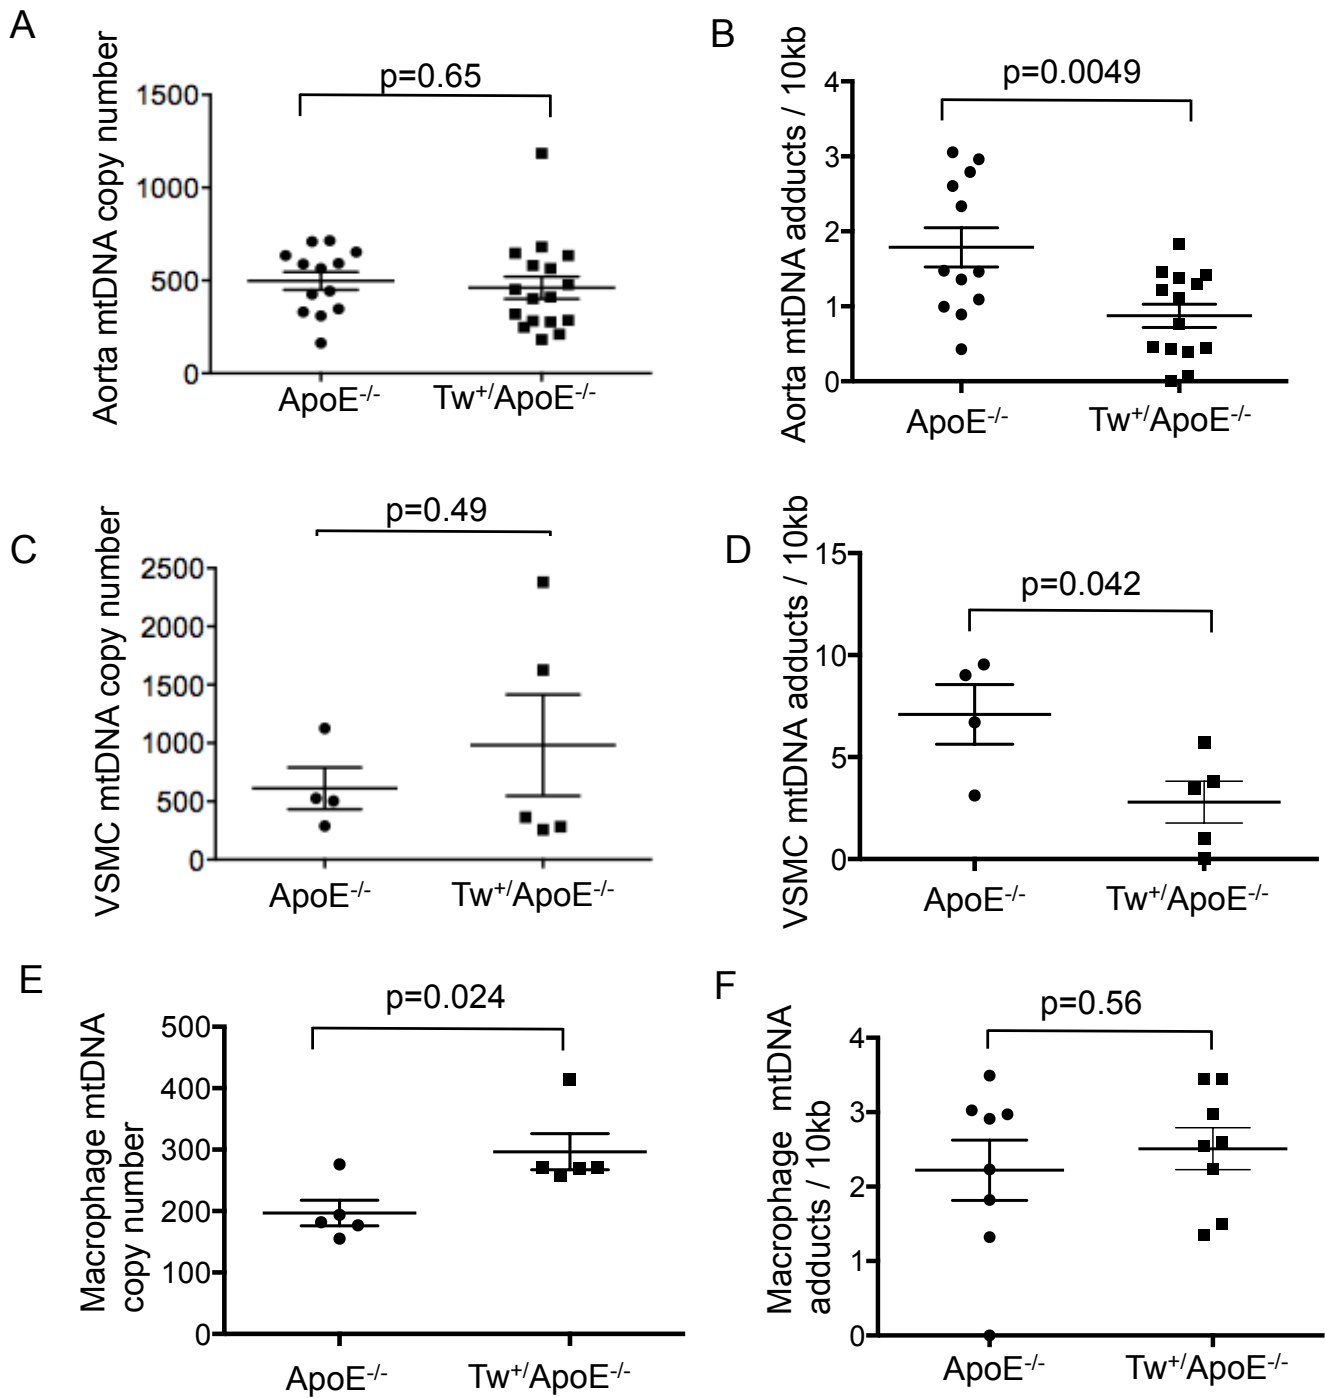

**Supplemental Figure III: Twinkle mice show tissue-specific increases in mtDNA copy number or reductions in mtDNA adducts**

(A-F) MtDNA copy number and mtDNA adducts in aorta (A-B), VSMCs (C-D) or bone marrow-derived macrophages (E-F) of control ApoE<sup>-/-</sup> and Tw<sup>+/</sup>ApoE<sup>-/-</sup> mice. (n=4-17).

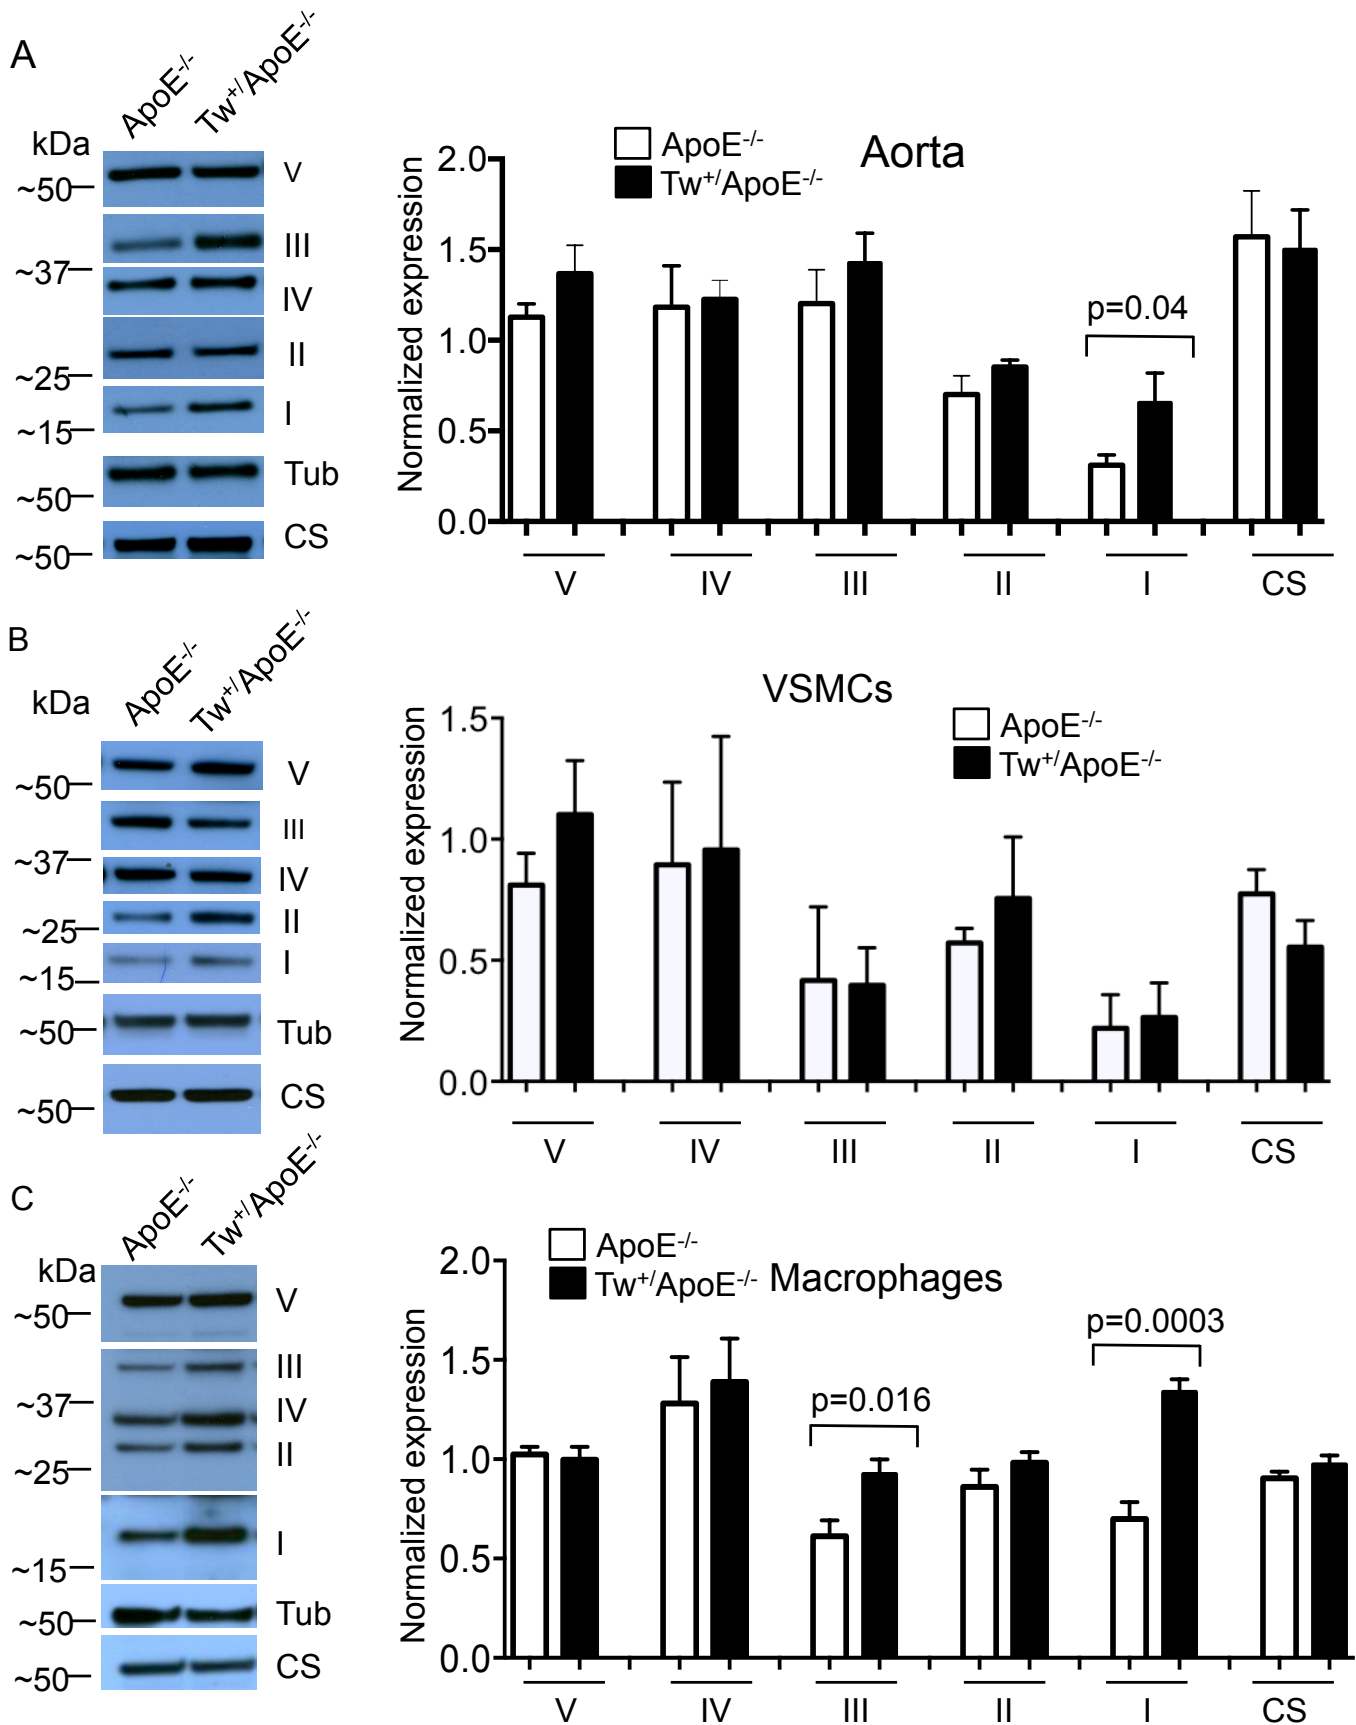

**Supplemental Figure IV. Twinkle increases ApoE expression of mitochondrial respiratory complexes in aorta and macrophages**

(A-C) Western blot (left) and quantification of western blots (right) for mitochondrial respiratory complex I-V or citrate synthase (CS) expression from aorta (A), VSMCs (B), and bone marrow-derived macrophages (C) derived from control ApoE<sup>-/-</sup> or Tw<sup>+/</sup>ApoE<sup>-/-</sup> mice n=4-6. Tub = tubulin.

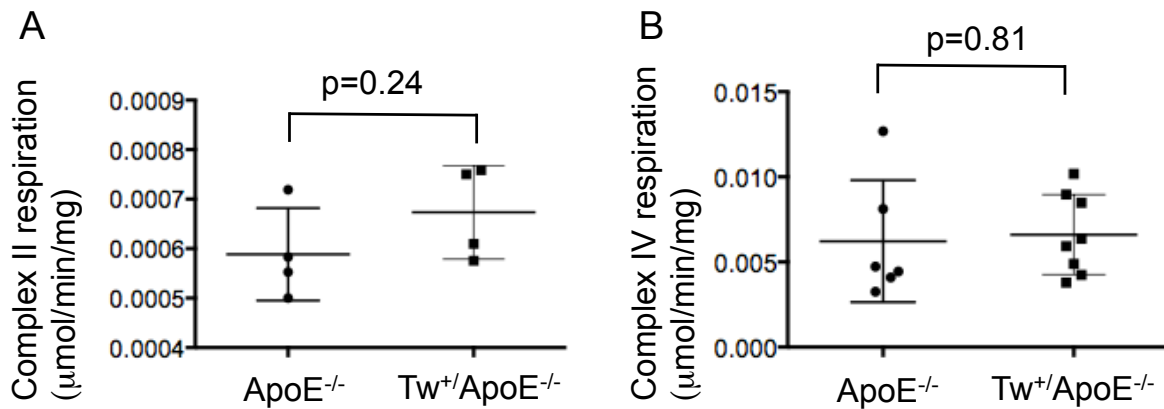

**Supplemental Figure V. Twinkle mice show no difference in aortic complex II or IV respiration.** Ex-vivo respirometry for complex II (**A**) and complex IV (**B**)-supported respiration in aortas from control ApoE<sup>-/-</sup> or Tw<sup>+/</sup>ApoE<sup>-/-</sup> mice after 14 weeks HFD (n=4-8).

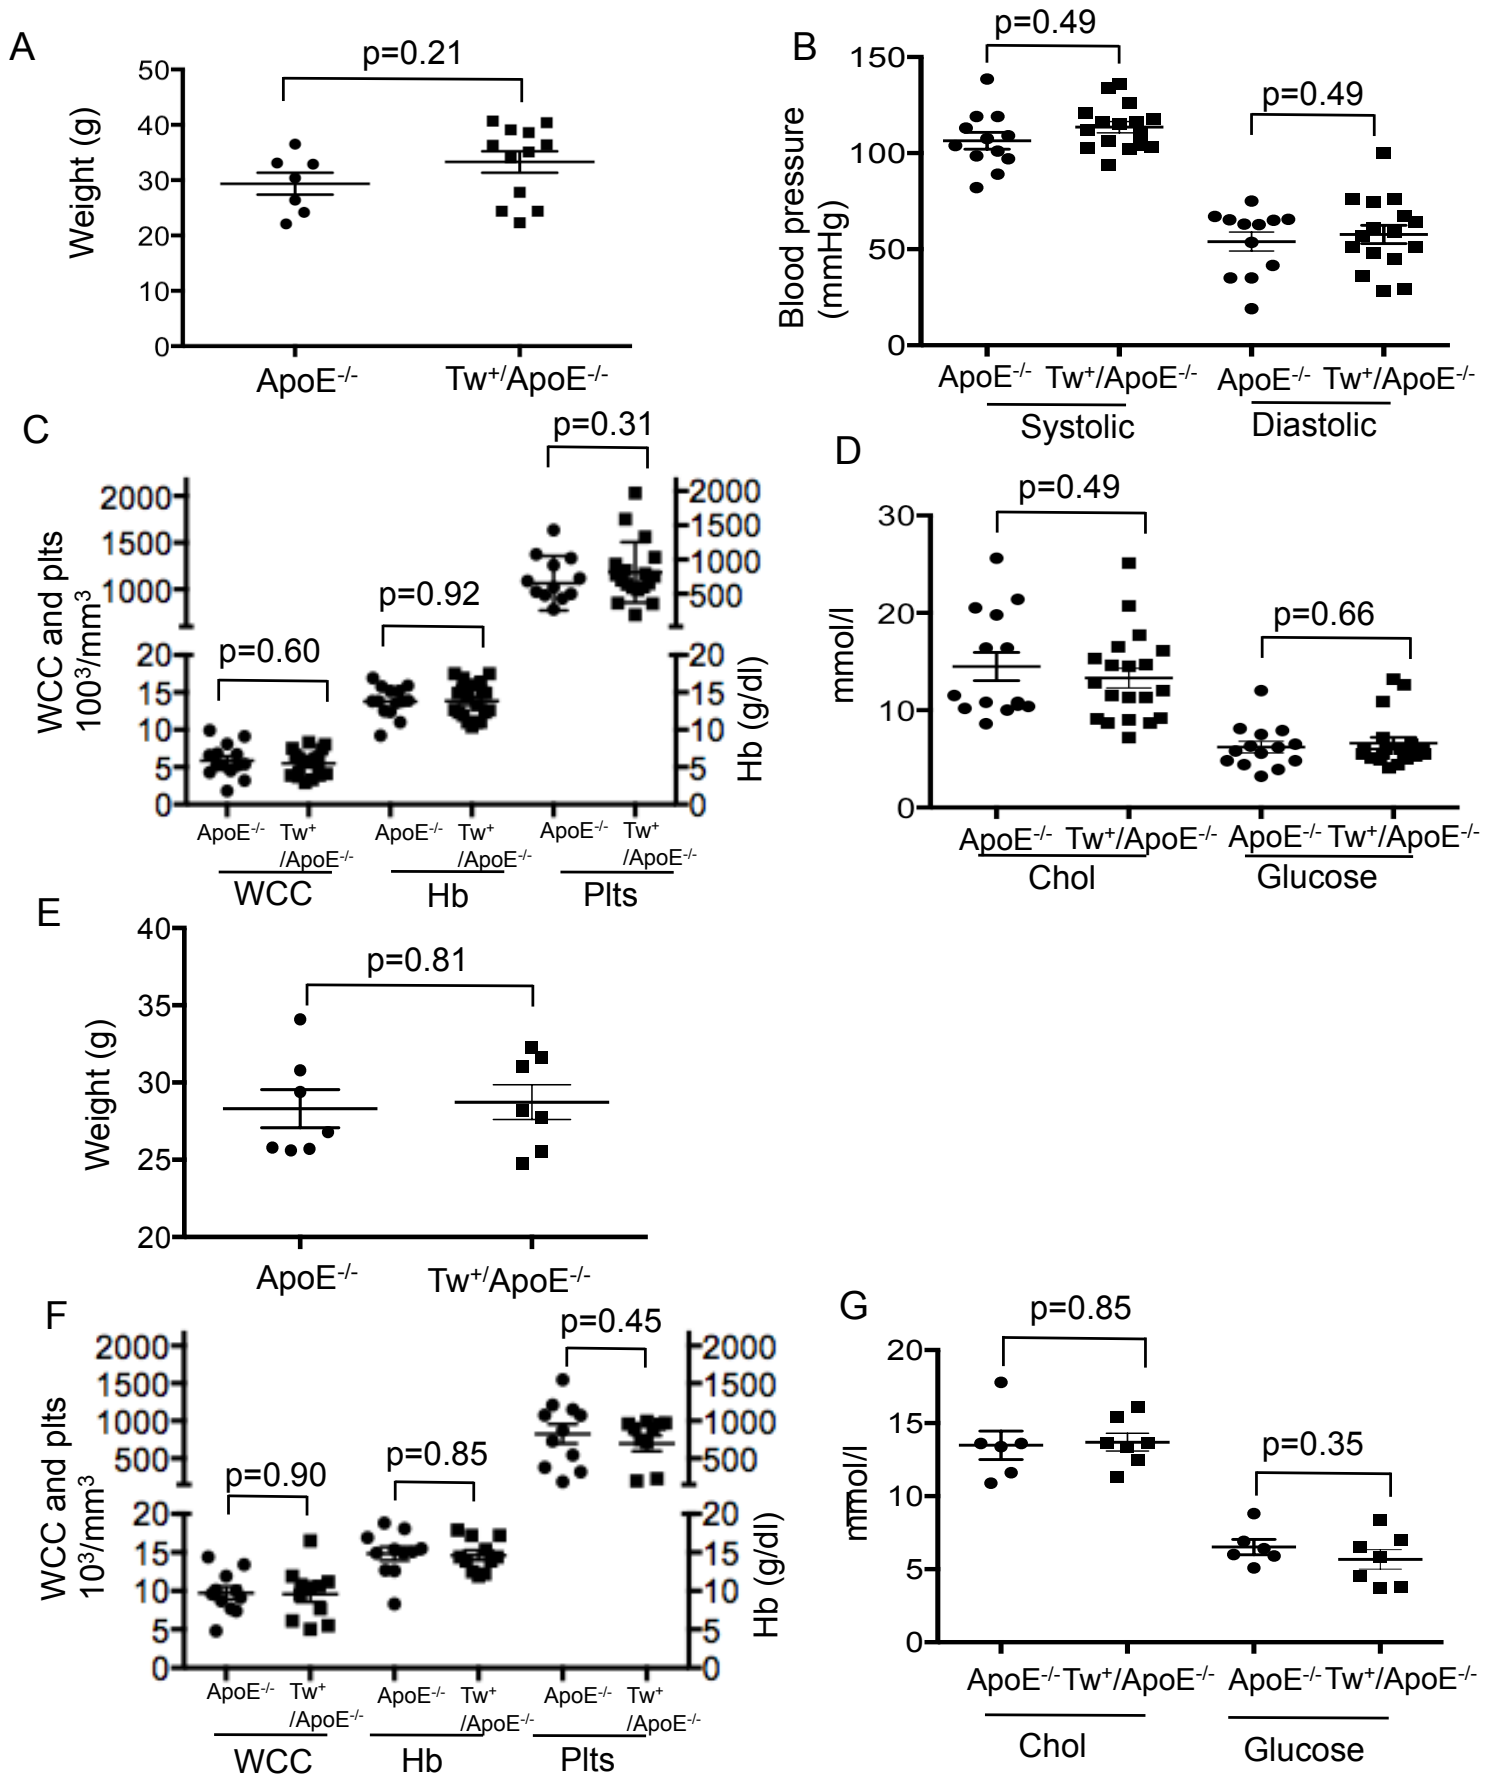

**Supplemental Figure VI. Twinkle mice show normal blood counts, weights and blood pressure**  
 Body weight, blood pressure, white cell count (WCC), Hemoglobin concentration (Hb) and platelet count (Plts), serum cholesterol (Chol) or glucose in control ApoE<sup>-/-</sup> and Tw<sup>+/</sup>ApoE<sup>-/-</sup> mice (**A-D**) or BMT of ApoE<sup>-/-</sup> mice with control ApoE<sup>-/-</sup> or Tw<sup>+/</sup>ApoE<sup>-/-</sup> marrow (**E-G**) and undergoing 14w HFD. n=7-14 (**A-D**), and 7-11 (**E-G**).

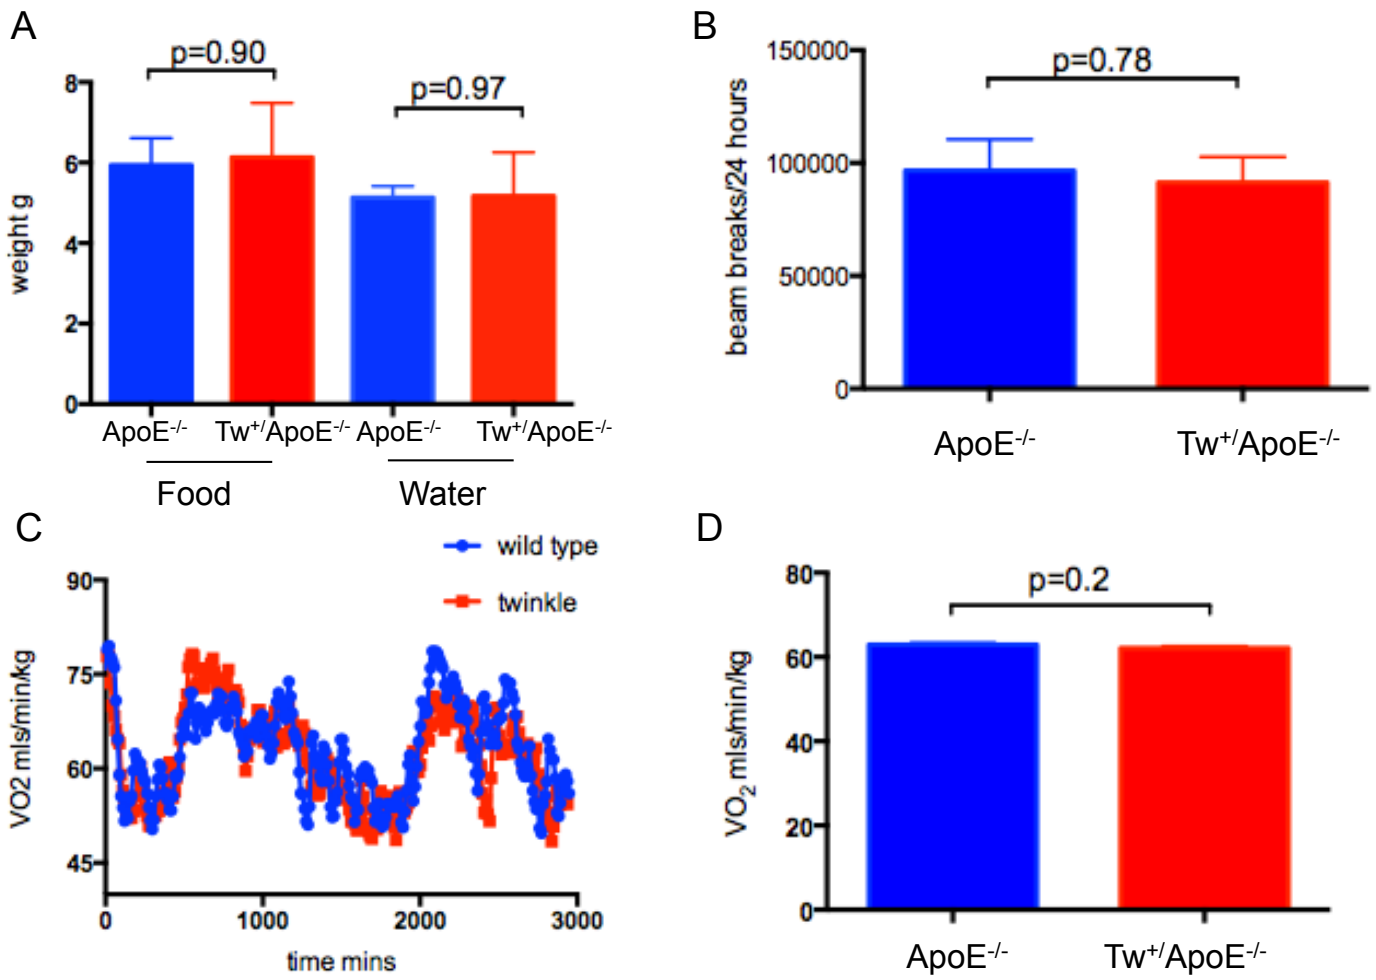

**Supplemental Figure VII. Twinkle mice show normal activity and total oxygen consumption**

Comprehensive laboratory animal monitoring system data of control ApoE<sup>-/-</sup> and Tw<sup>+/</sup>ApoE<sup>-/-</sup> mice after 13 weeks of HFD (n=3). Food and water intake (**A**). Activity measured as the total number of beam breaks per 24 hours (**B**). Oxygen consumption (VO<sub>2</sub>) profile (**C**) or mean VO<sub>2</sub> normalised to body mass (**D**).

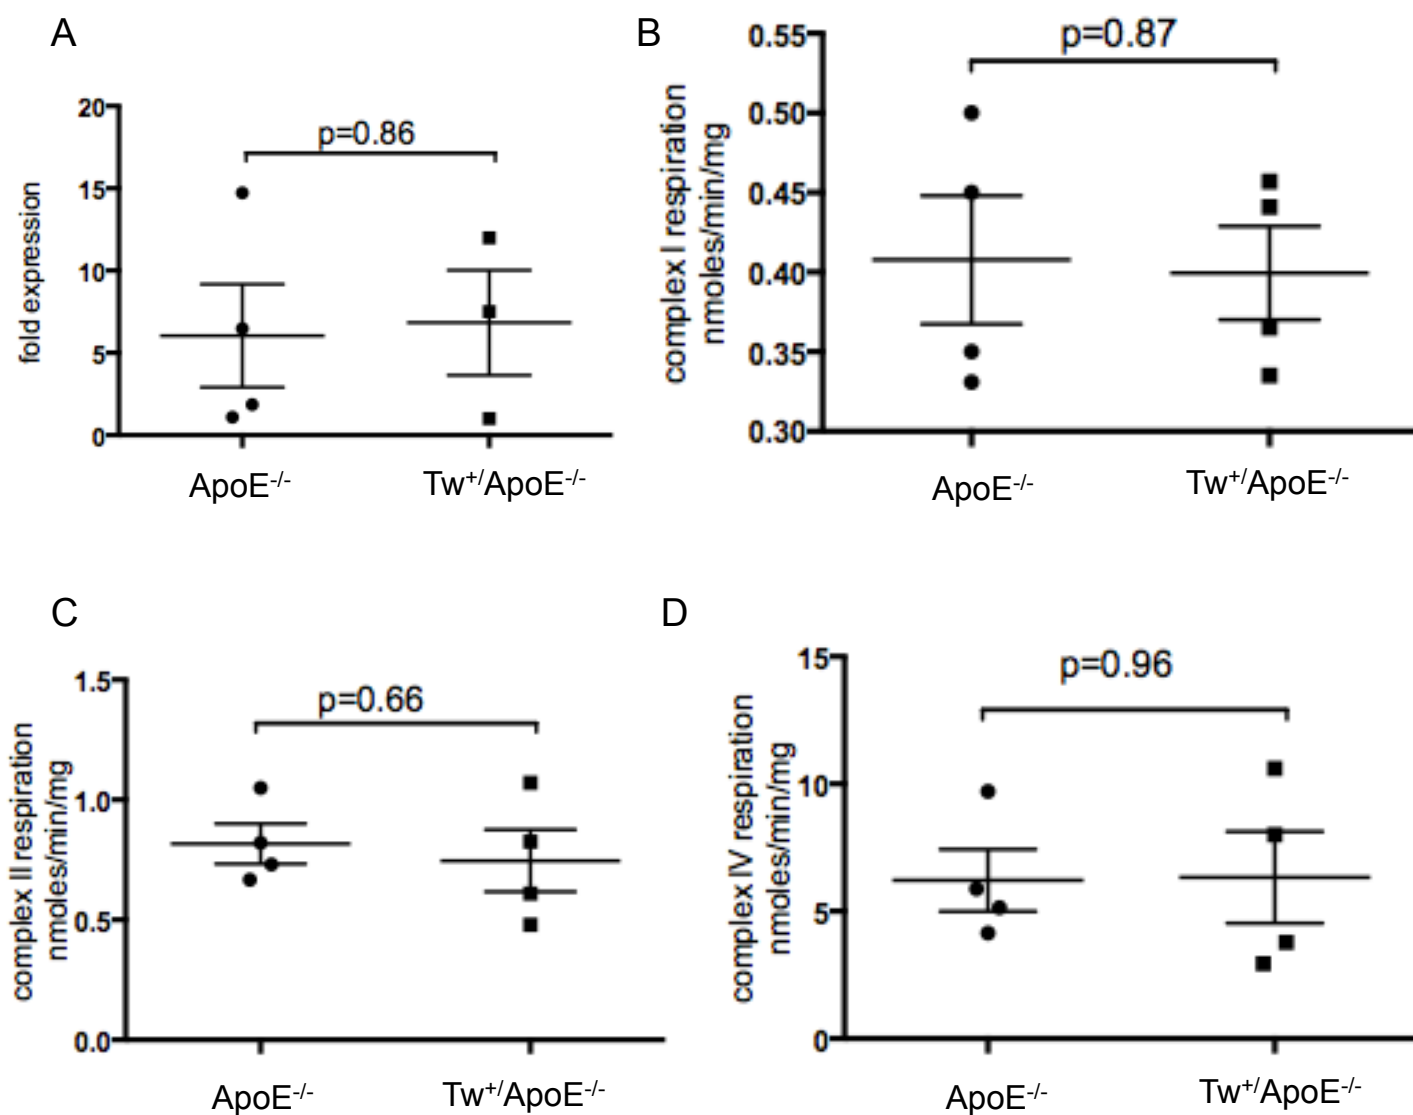

**Supplemental Figure VIII. Tw<sup>+</sup> bone marrow transplantation has no effect on aortic twinkle expression or respiration**

(A-C) ApoE<sup>-/-</sup> mice were transplanted with control ApoE<sup>-/-</sup> mice or Tw<sup>+</sup>/ApoE<sup>-/-</sup> bone marrow and fat fed from 6-20w (n=3-4) and aortas examined for (A) twinkle expression, Complex I (B), II (C) and IV-supported respiration (D). Data for Tw expression are expressed as fold expression versus ApoE<sup>-/-</sup> mice.



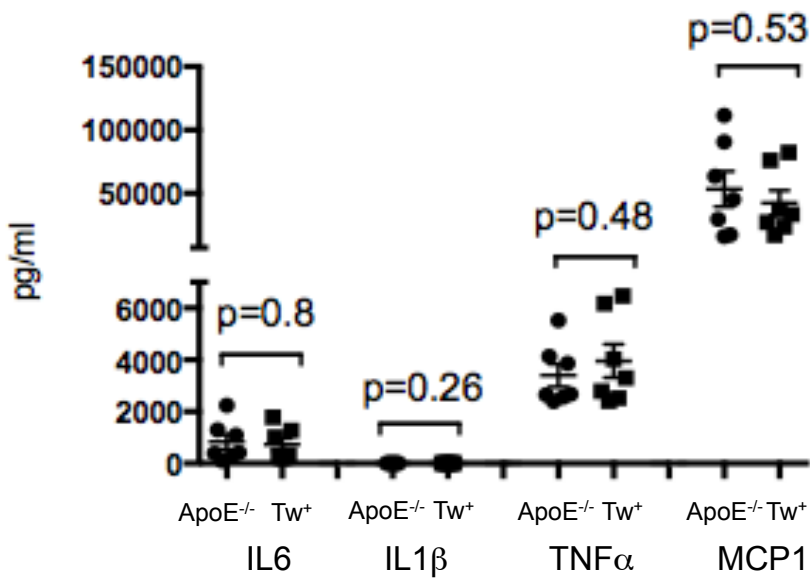

**Supplemental Figure IX. Tw<sup>+</sup>/ApoE<sup>-/-</sup> macrophages show no difference in cytokine release**

Cytokine release after treatment with 1μg/ml LPS from Tw<sup>+</sup>/ApoE<sup>-/-</sup> (Tw<sup>+</sup>) and ApoE<sup>-/-</sup> bone marrow derived macrophages (n=7). IL indicates interleukin, TNFα, tumour necrosis factor-α and MCP1, monocyte chemoattractant protein-1.
